# Supplementary material for: Bisursodeoxycholate(ethylenediamine)platinum(ii): a new autofluorescent compound. Cytotoxic activity and cell cycle analysis in ovarian and hematological cell lines
Source: Royal Society of Chemistry journal article supplement (doi:10.1039/b807965j), 2008-01-01
Supplement: b807965j.pdf [file b807965j.pdf]

Supporting information

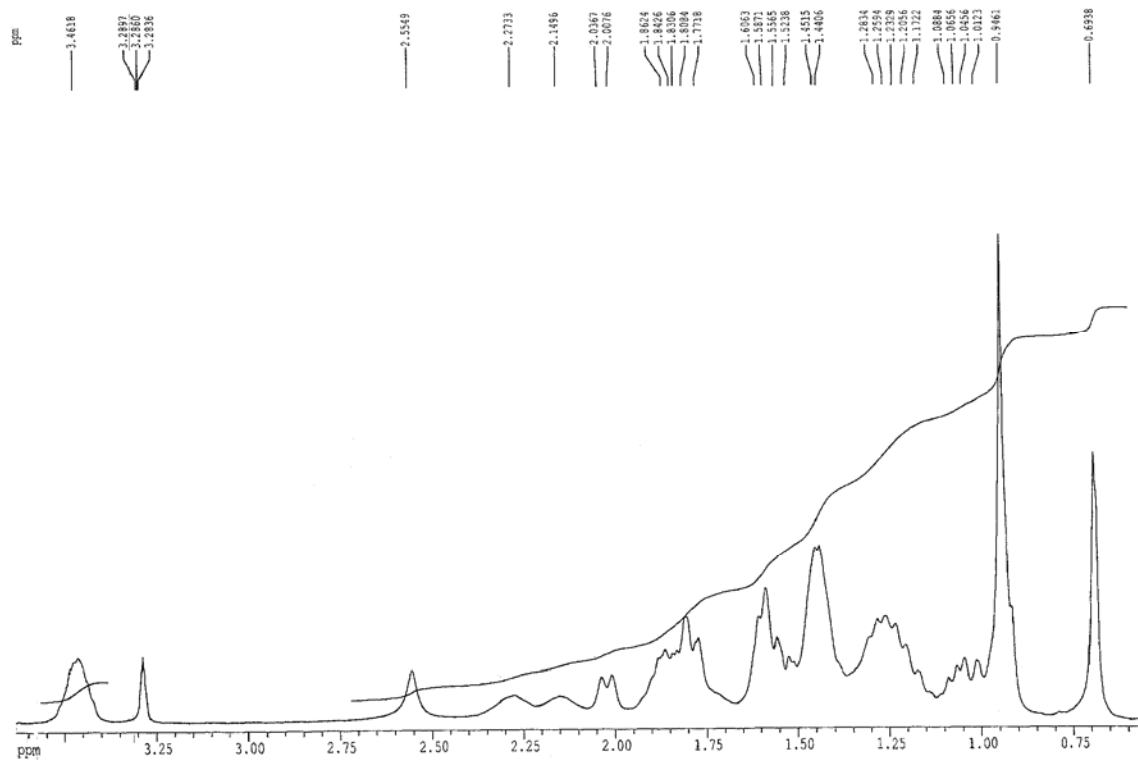

Figure A.-  $^1\text{H}$  NMR spectrum of  $[\text{Pt}(\text{UDC})_2(\text{en})]$  in  $\text{MeOH-}d_4$

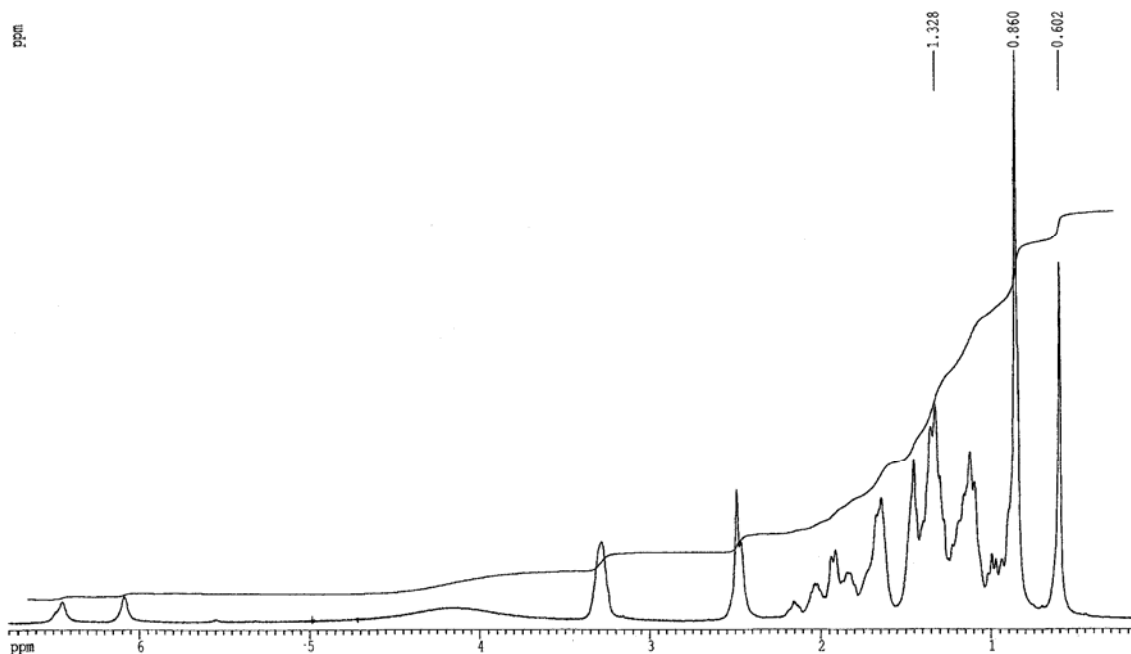

Figure B.-  $^1\text{H}$  NMR spectrum of  $[\text{Pt}(\text{UDC})_2(\text{en})]$  in  $\text{DMSO-}d_6$

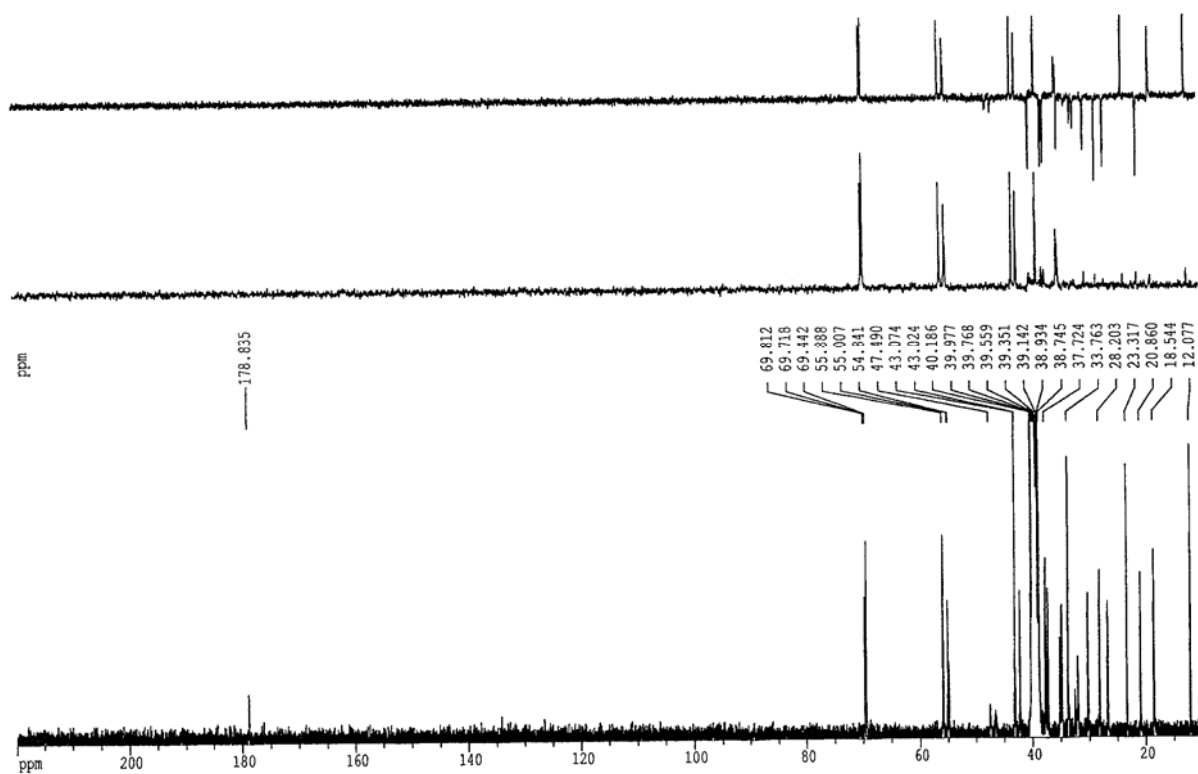

Figure D-  $^{13}\text{C}$  NMR spectrum of  $[\text{Pt}(\text{UDC})_2(\text{en})]$  in  $\text{DMSO-}d_6$

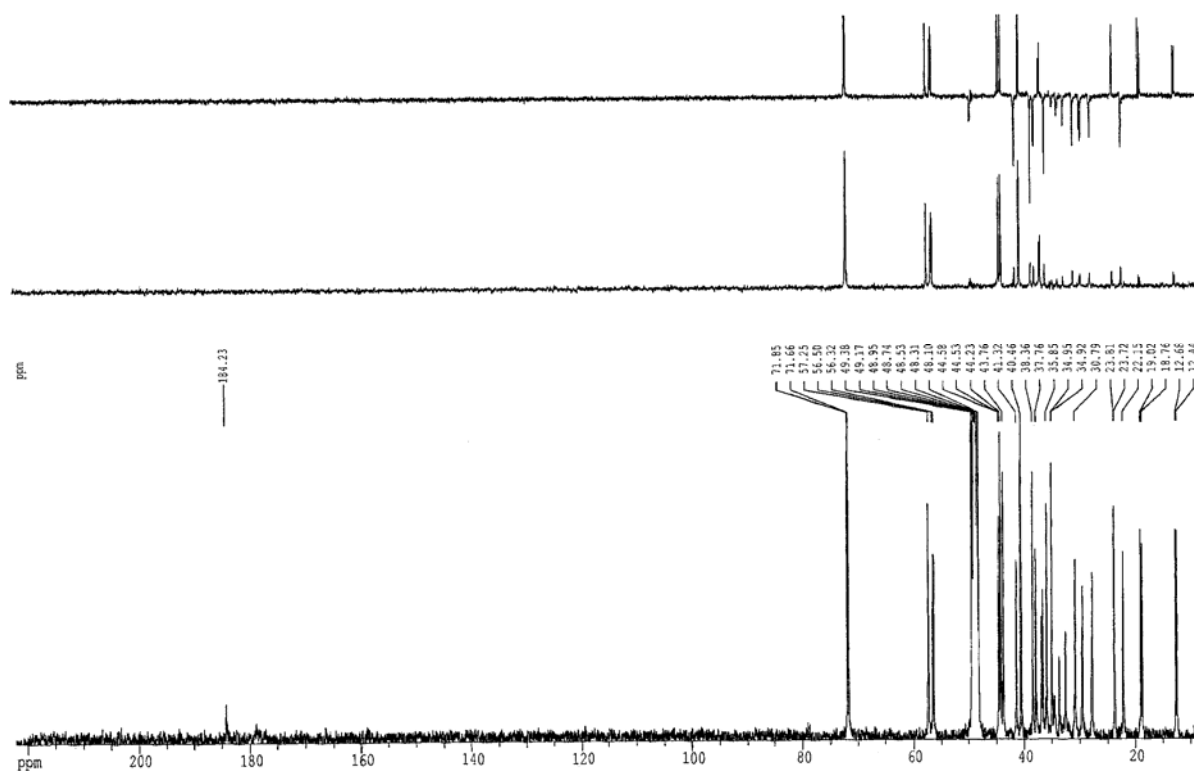

Figure C.-  $^{13}\text{C}$  NMR spectrum of  $[\text{Pt}(\text{UDC})_2(\text{en})]$  in  $\text{MeOH-}d_4$

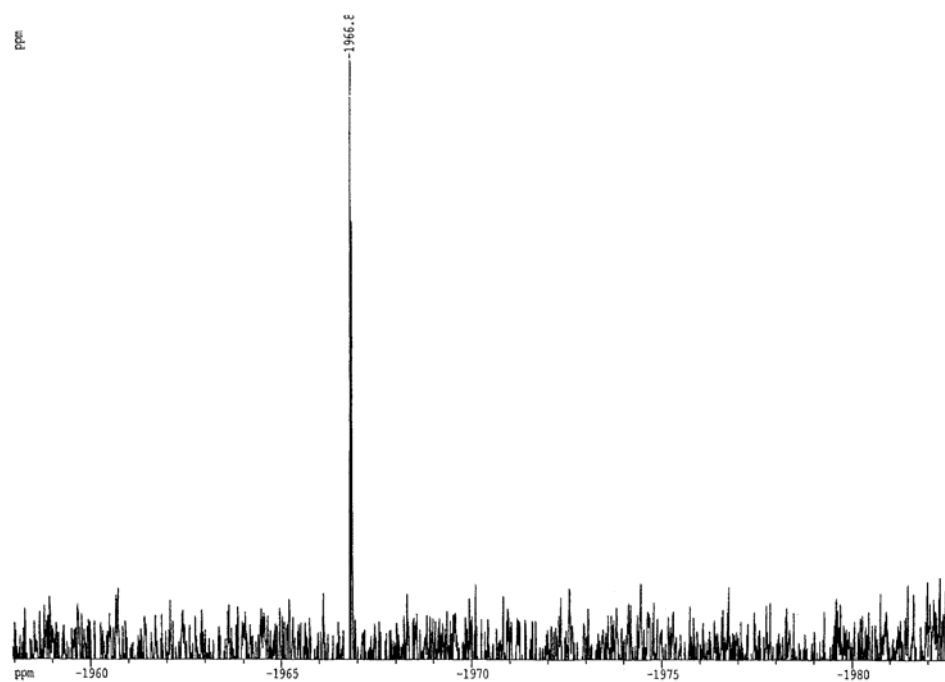

Figure E.-  $^{195}\text{Pt}$  NMR spectrum of  $[\text{Pt}(\text{UDC})_2(\text{en})]$  in  $\text{DMSO-}d_6$
